# Supplementary material
Source: publisher site journal article supplement (https://static.cambridge.org/content/id/urn:cambridge.org:id:article:S0090599219001302/resource/name/S0090599219001302supp002.pdf)

## Russia

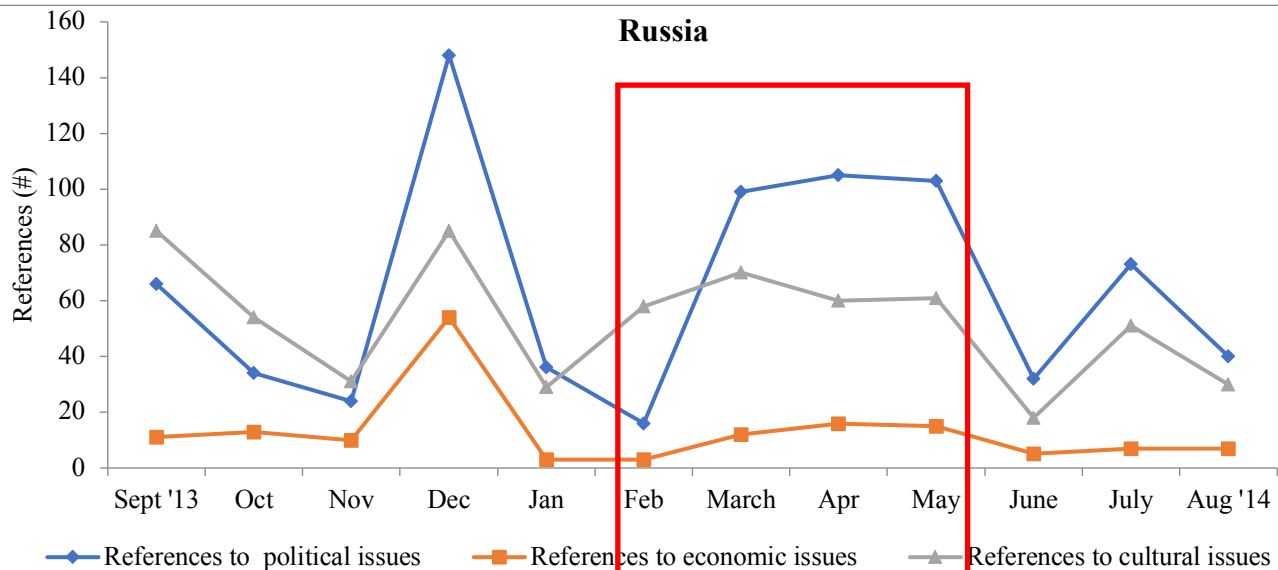

## Ukraine

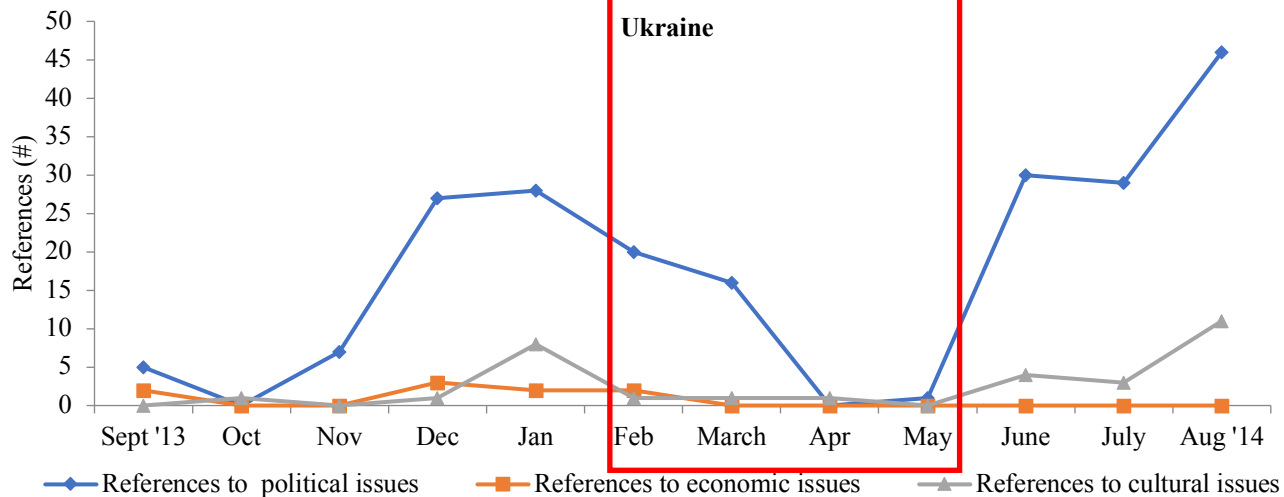

Supplement: Supplementary file 1 [file S0090599219001302supp002.pdf]
